# Supplementary material for: The alarming problems of confounding equivalence using logistic regression models in the perspective of causal diagrams
Source: BMC Med Res Methodol. 2017 Dec 28;17:177. doi: 10.1186/s12874-017-0449-7 (PMC5745640; doi:10.1186/s12874-017-0449-7)
Supplement: Supplementary file 1 — Appendix: Deducing whether c-equivalence had same bias-reducing potential under logistic regression model. (DOCX 107 kb) [file 12874_2017_449_MOESM1_ESM.docx]

**Appendix: Deducing whether *c-equivalence* had same bias-reducing potential under logistic regression model.**

Considered scenario 1 (Figure 1A) as a typical diagram. In this causal diagram, *A*1={*Z*}, *A*2={*T*} and *A*3={*Z, T*} composed the *c-equivalence* group that was sufficient to block all “back-door” paths from *X* to *Y* which was the second condition *c-equivalence*.

For *c-equivalence* sets *A*1*≈A*2*≈A*3, the average causal effect () of *X* on *Y* was calculated as ,

where

.

Then,

Let,

which could represent the causal effect on the scale of odds ratio (OR).

By conditioning on *A*1={*Z*}, the effect of *X* on *Y* was equal to

Let,

which represented the effect after adjusting for *A*1 on the scale of the OR. Then, we could calculate that, where

;

Similarly, the effect of *X* on *Y*, when conditioning on *A*2*=*{*T*}, was equal to

.

Furthermore, the effect of *X* on *Y*, when conditioning on *A*3={*T*, *Z*}, was

.

To determine whether for *A*1*≈A*2*≈A*3, we need to compare , and . Easily, we easily obtained.

Then, we compared with,

and compared with 1.

Because and , we only need to compare with

If or ,

If and ,

If and ,

According the deduction above, we could see that

If or ,

If and ,

If  and ,

We obtained under all conditions, suggesting that the bias-reducing of *c-equivalence* *A2*≈*A*3 was always equivalent under the logistic regression model. By contrast, only if or , indicating that the bias-reducingof *c-equivalence* *A*1≈*A2*≈*A*3 remained equivalent under the logistic regression model in this situation. However, if and ; and if and indicating that the unequal bias-reducing of the *c-equivalence* of *A*1≈*A2*≈*A*3 no longer held when bothandwere not equal to zero.
